# Supplementary material for: Homo- and heteroleptic trimethoxy terpyridine–Cu(ii) complexes: synthesis, characterization, DNA/BSA binding, DNA cleavage and cytotoxicity studies
Source: Royal Society of Chemistry journal article supplement (doi:10.1039/d0dt00209g), 2020-01-01
Supplement: d0dt00209g1.pdf [file d0dt00209g1.pdf]

## Homo- and Heteroleptic trimethoxy terpyridine-Cu(II) complexes: Synthesis, Characterization, DNA/BSA Binding, DNA Cleavage and Cytotoxicity Studies

Surbhi Jain<sup>a</sup>, Kishalay Bhar<sup>a</sup>, Sandeep Kumar<sup>b</sup>, Shreetama Bandyopadhyaya<sup>c</sup>, Suman Tapryal<sup>b</sup>, Chandi C. Mandal<sup>c</sup>, Anuj K. Sharma<sup>a\*</sup>

<sup>a</sup>Department of Chemistry, School of Chemical Sciences and Pharmacy, Central University of Rajasthan, Bandarsindri, District Ajmer, Rajasthan, 305817, India.

<sup>b</sup>Department of Biotechnology, School of Chemical Sciences and Pharmacy, Central University of Rajasthan, Bandarsindri, District Ajmer, Rajasthan, 305817, India.

<sup>c</sup>Department of Biochemistry, School of Chemical Sciences and Pharmacy, Central University of Rajasthan, Bandarsindri, District Ajmer, Rajasthan, 305817, India.

### Supporting Information

| Contents |                    |                                                                                                                                                         |
|----------|--------------------|---------------------------------------------------------------------------------------------------------------------------------------------------------|
| 1.       | <b>Figure S1.</b>  | Data and graph for elemental analysis of <b>C-I</b> .                                                                                                   |
| 2.       | <b>Figure S2.</b>  | Data and graph for elemental analysis of <b>C-II</b> .                                                                                                  |
| 3.       | <b>Figure S3.</b>  | Data and graph for elemental analysis of <b>C-III</b> .                                                                                                 |
| 4.       | <b>Figure S4.</b>  | Data and graph for elemental analysis of <b>C-IV</b> .                                                                                                  |
| 5.       | <b>Figure S5.</b>  | FTIR spectrum of <b>C-I</b> .                                                                                                                           |
| 6.       | <b>Figure S6.</b>  | FTIR spectrum of <b>C-II</b> .                                                                                                                          |
| 7.       | <b>Figure S7.</b>  | FTIR spectrum of <b>C-III</b> .                                                                                                                         |
| 8.       | <b>Figure S8.</b>  | FTIR spectrum of <b>C-IV</b> .                                                                                                                          |
| 9.       | <b>Figure S9.</b>  | <sup>1</sup> H NMR spectrum of <b>L</b> in CDCl <sub>3</sub> .                                                                                          |
| 10.      | <b>Figure S10.</b> | <sup>13</sup> C NMR spectrum of ligand <b>L</b> in CDCl <sub>3</sub> .                                                                                  |
| 11.      | <b>Figure S11.</b> | ESI-Mass spectrum of <b>C-I</b> recorded in MeCN.                                                                                                       |
| 12.      | <b>Figure S12.</b> | ESI-Mass spectrum of <b>C-II</b> recorded in MeCN.                                                                                                      |
| 13.      | <b>Figure S13.</b> | ESI-Mass spectrum of <b>C-III</b> recorded in MeCN.                                                                                                     |
| 14.      | <b>Figure S14.</b> | UV-vis absorption spectra of <b>L</b> in MeCN.                                                                                                          |
| 15.      | <b>Figure S15.</b> | UV- Visible absorption spectra of <b>C-I</b> recorded in MeCN and MeCN:PBS buffer (1:1) upto 48 h at 298 K.                                             |
| 16.      | <b>Figure S16.</b> | UV- Visible absorption spectra of <b>C-II</b> recorded in MeCN and MeCN:PBS buffer (1:1) upto 48 h at 298 K.                                            |
| 17.      | <b>Figure S17.</b> | UV- Visible absorption spectra of <b>C-III</b> recorded in MeCN and MeCN:PBS buffer (1:1) upto 48 h at 298 K.                                           |
| 18.      | <b>Figure S18.</b> | UV- Visible absorption spectra of <b>C-IV</b> recorded in MeCN and MeCN:PBS buffer (1:1) upto 48 h at 298 K.                                            |
| 19.      | <b>Figure S19.</b> | Crystal packing of <b>C-I</b> showing $\pi$ - $\pi$ interaction and H-bonding.                                                                          |
| 20.      | <b>Figure S20.</b> | Crystal packing of <b>C-II</b> showing H-bonding.                                                                                                       |
| 21.      | <b>Figure S21.</b> | Crystal packing of <b>C-IV</b> showing $\pi$ - $\pi$ interaction and H-bonding.                                                                         |
| 22.      | <b>Figure S22.</b> | X-band EPR spectrum of complex <b>C-II</b> in MeCN glass at 77 K (frequency 9.1 GHz and 100 kHz field).                                                 |
| 23.      | <b>Figure S23.</b> | X-band EPR spectrum of complex <b>C-III</b> in MeCN glass at 77 K (frequency 9.1 GHz and 100 kHz field).                                                |
| 24.      | <b>Figure S24.</b> | X-band EPR spectrum of complex <b>C-IV</b> in MeCN glass at 77 K (frequency 9.1 GHz and 100 kHz field).                                                 |
| 22.      | <b>Figure S25.</b> | Cyclic voltammogram of <b>C-I</b> (1 mM) solution in dry CH <sub>3</sub> CN and 0.1 M TBAP as supporting electrolyte vs. Ag wire at varying scan rates. |

|     |                    |                                                                                                                                                                                                                                                         |
|-----|--------------------|---------------------------------------------------------------------------------------------------------------------------------------------------------------------------------------------------------------------------------------------------------|
| 23. | <b>Figure S26.</b> | Cyclic voltammogram of <b>C-II</b> (1 mM) solution in dry CH <sub>3</sub> CN and 0.1 M TBAP as supporting electrolyte vs. Ag wire at varying scan rates.                                                                                                |
| 24. | <b>Figure S27.</b> | Cyclic voltammogram of <b>C-III</b> (1 mM) solution in dry CH <sub>3</sub> CN and 0.1 M TBAP as supporting electrolyte vs. Ag wire at varying scan rates.                                                                                               |
| 25. | <b>Figure S28.</b> | Cyclic voltammogram of <b>C-IV</b> (1 mM) solution in dry CH <sub>3</sub> CN and 0.1 M TBAP as supporting electrolyte vs. Ag wire at varying scan rates.                                                                                                |
| 26. | <b>Figure S29.</b> | Plot of fluorescence emission intensity <i>I</i> versus wavelength $\lambda$ for DNA-EtBr at different concentrations of <b>C-II</b> . The arrow shows the change in intensity of emission on increasing amount of the complex from 0 to 50 $\mu$ M.    |
| 27. | <b>Figure S30.</b> | Plot of fluorescence emission intensity <i>I</i> versus wavelength $\lambda$ for DNA-EtBr at different concentrations of <b>C-III</b> . The arrow shows the change in intensity of emission on increasing amount of the complex from 0 to 50 $\mu$ M.   |
| 28. | <b>Figure S31.</b> | Plot of fluorescence emission intensity <i>I</i> versus wavelength $\lambda$ for DNA-EtBr at different concentrations of <b>C-IV</b> . The arrow shows the change in intensity of emission on increasing amount of the complex from 0 to 50 $\mu$ M.    |
| 29. | <b>Figure S32.</b> | Plot of fluorescence emission intensity <i>I</i> versus wavelength $\lambda$ for BSA at different concentrations of <b>C-II</b> . The arrow shows the change in intensity of emission on increasing amount of the complex from 0 to around 50 $\mu$ M.  |
| 30. | <b>Figure S33.</b> | Plot of fluorescence emission intensity <i>I</i> versus wavelength $\lambda$ for BSA at different concentrations of <b>C-III</b> . The arrow shows the change in intensity of emission on increasing amount of the complex from 0 to around 50 $\mu$ M. |
| 31. | <b>Figure S34.</b> | Plot of fluorescence emission intensity <i>I</i> versus wavelength $\lambda$ for BSA at different concentrations of <b>C-IV</b> . The arrow shows the change in intensity of emission on increasing amount of the complex from 0 to around 50 $\mu$ M.  |
| 32. | <b>Figure S35.</b> | Agarose gel electrophoresis for complexes <b>C-I</b> to <b>C-IV</b> showing DNA aggregation in presence of H <sub>2</sub> O <sub>2</sub> .                                                                                                              |
| 33. | <b>Figure S36.</b> | Agarose gel electrophoresis for terpyridine ligand and co-ligands in presence of 3-MPA.                                                                                                                                                                 |
| 34. | <b>Figure S37.</b> |                                                                                                                                                                                                                                                         |
| 35. | <b>Table S1.</b>   | Consolidated characterization data for copper(II) complexes ( <b>C-I</b> - <b>C-IV</b> )                                                                                                                                                                |
| 36. | <b>Table S2.</b>   | Summary of crystal data for complexes <b>C-I</b> , <b>C-II</b> and <b>C-IV</b>                                                                                                                                                                          |
| 37. | <b>Table S3.</b>   | Selected bond lengths ( $\text{\AA}$ ) and bond angles ( $^\circ$ ) for complexes <b>C-I</b> , <b>C-II</b> and <b>C-IV</b>                                                                                                                              |
| 38. | <b>Table S4.</b>   | Summary of IC <sub>50</sub> values for similar Cu(II) complexes in cancer cell line.                                                                                                                                                                    |

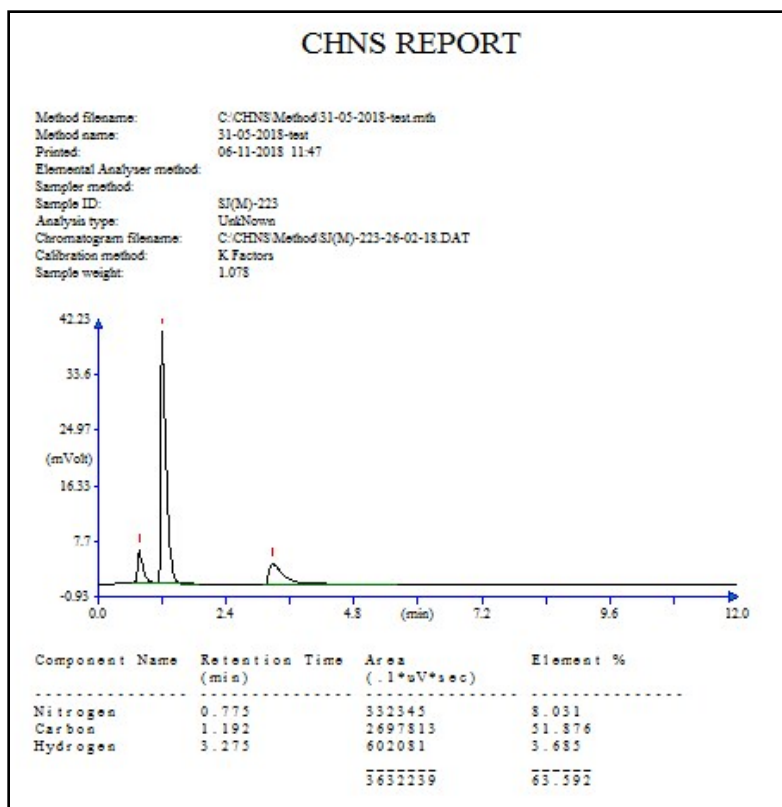

**Figure S1.** Data and graph for elemental analysis of C-I.

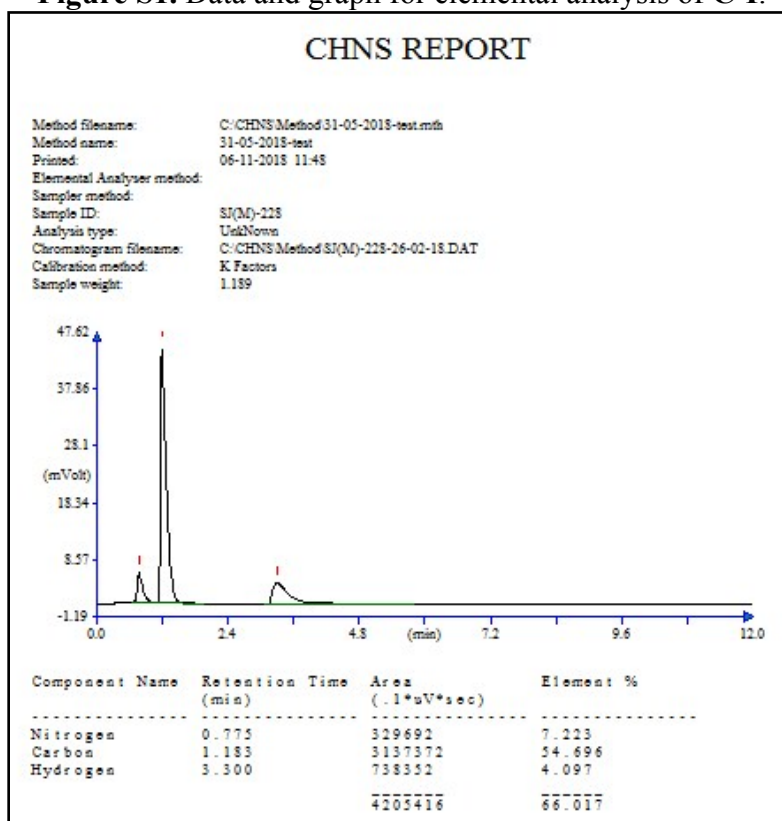

**Figure S2.** Data and graph for elemental analysis of C-II.

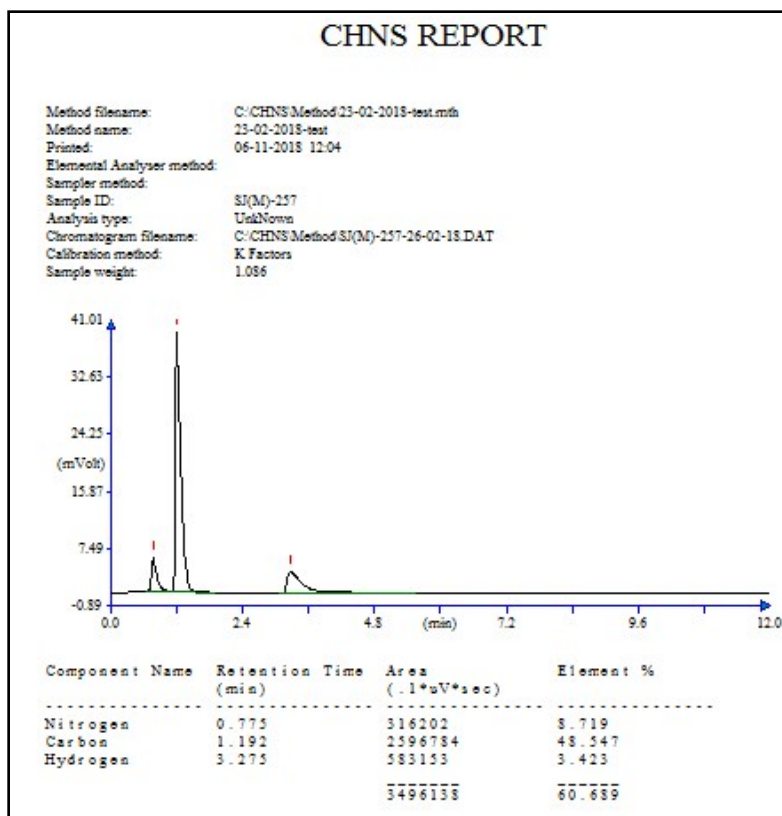

**Figure S3.** Data and graph for elemental analysis of C-III.

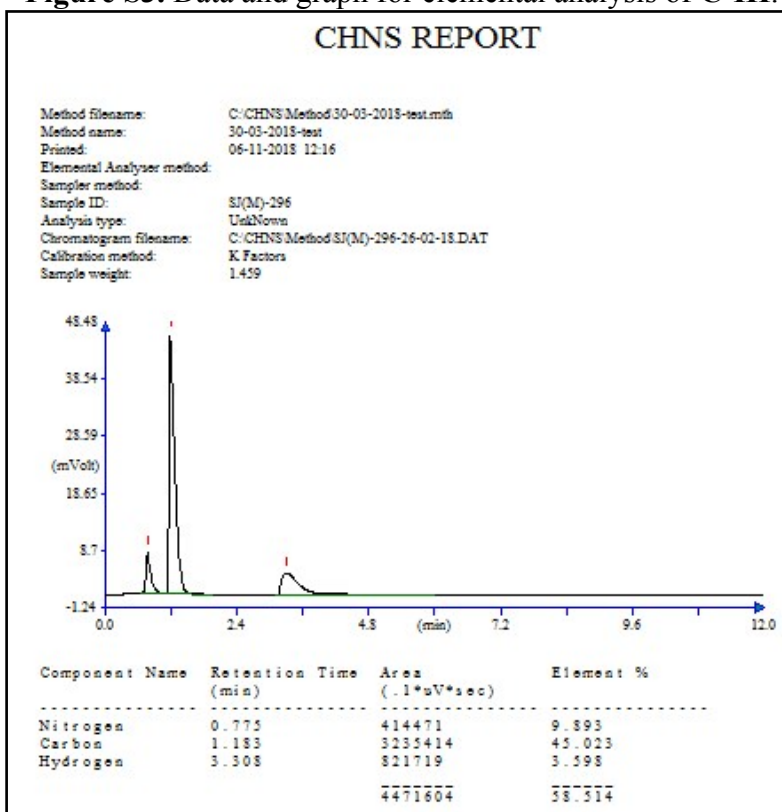

**Figure S4.** Data and graph for elemental analysis of C-IV

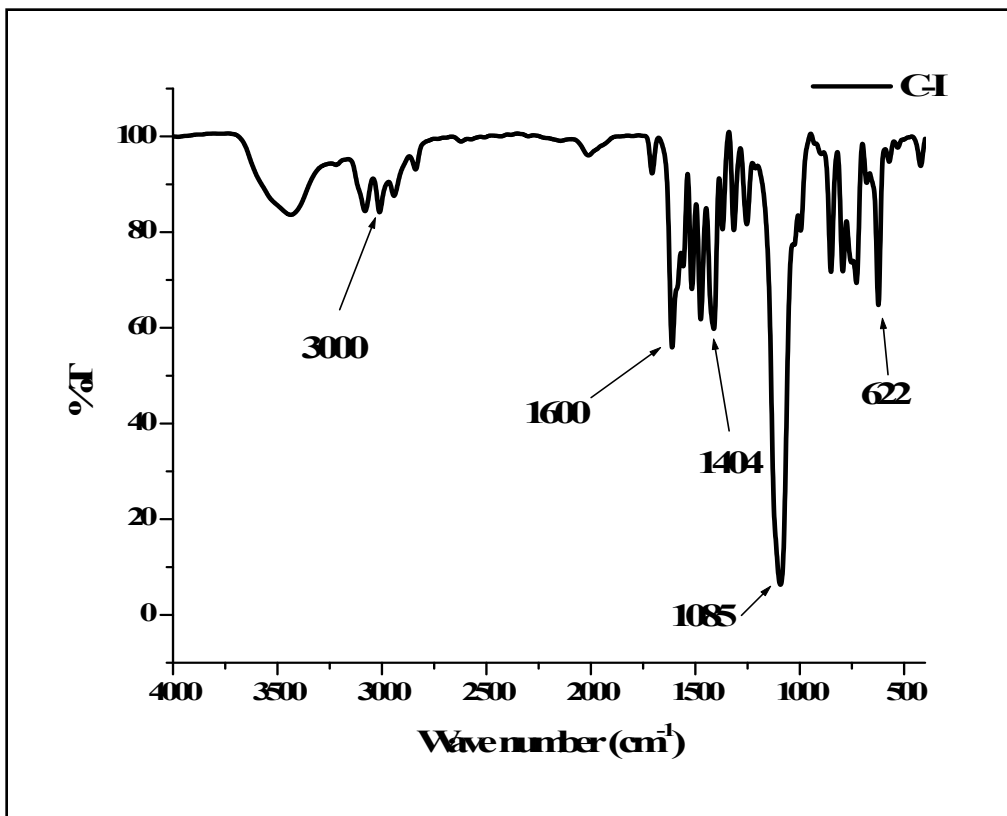

Figure S5. IR spectrum of C-I.

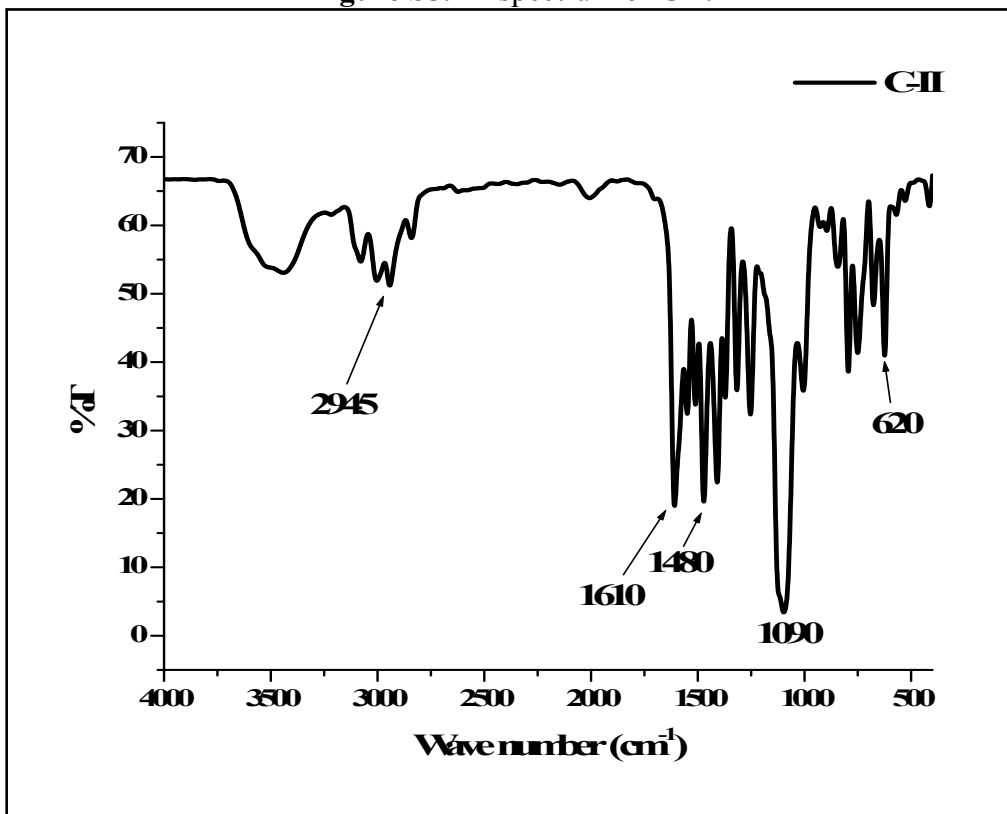

Figure S6. IR spectrum of C-II.

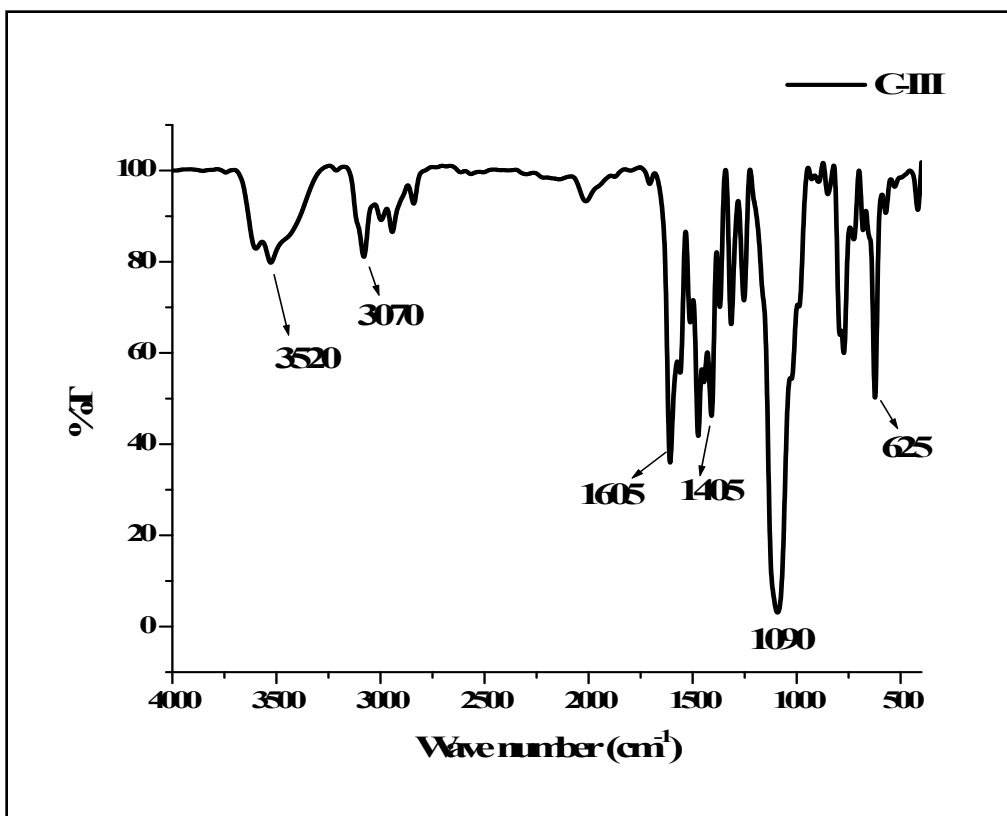

Figure S7. IR spectrum of C-III.

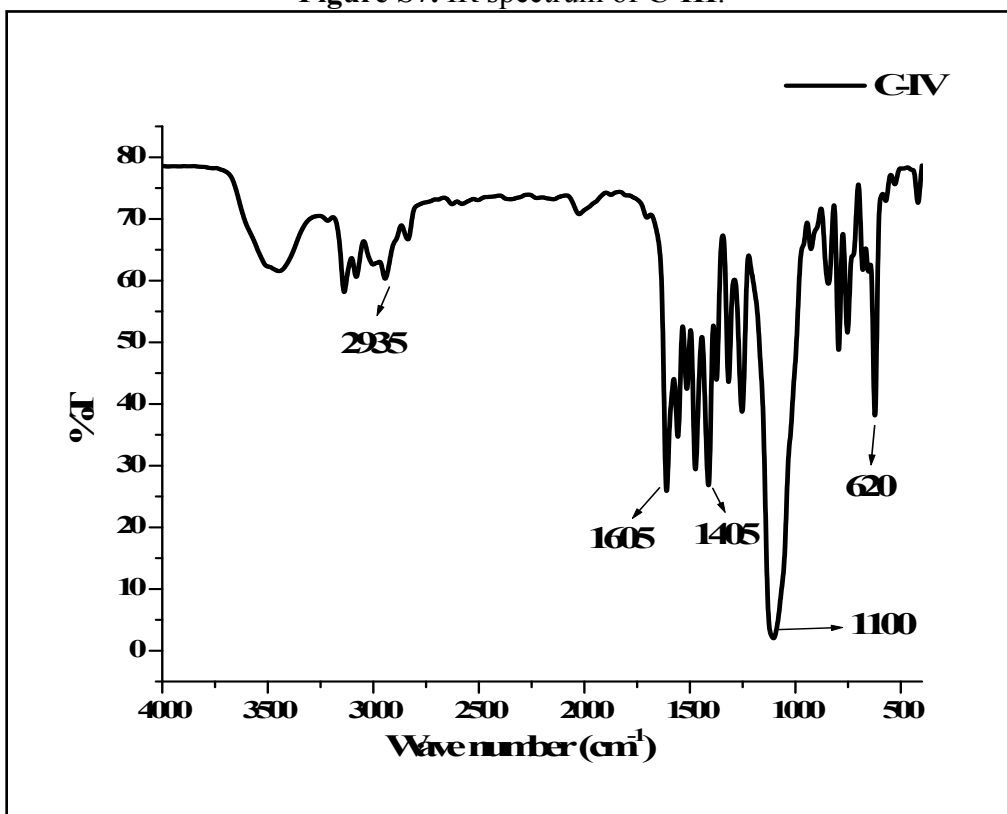

Figure S8. IR spectrum of C-IV.

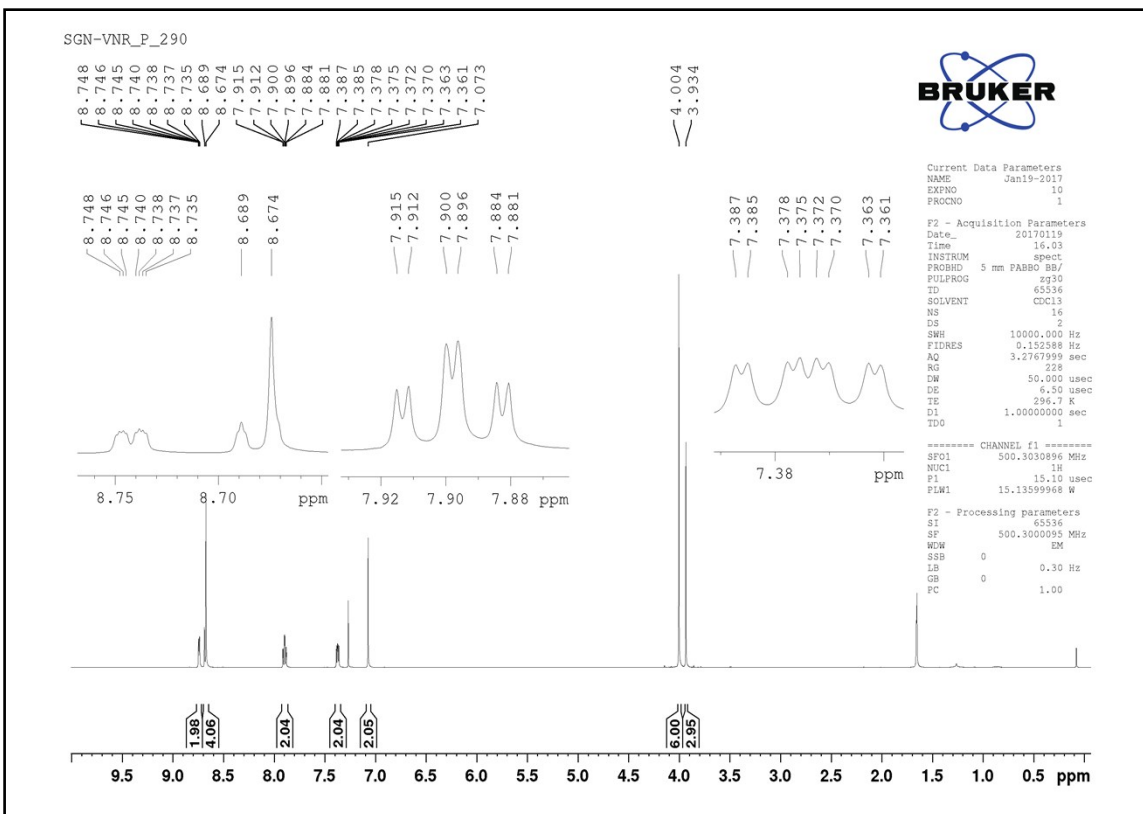

Figure S9.  $^1\text{H}$  NMR spectrum of ligand L in  $\text{CDCl}_3$ .

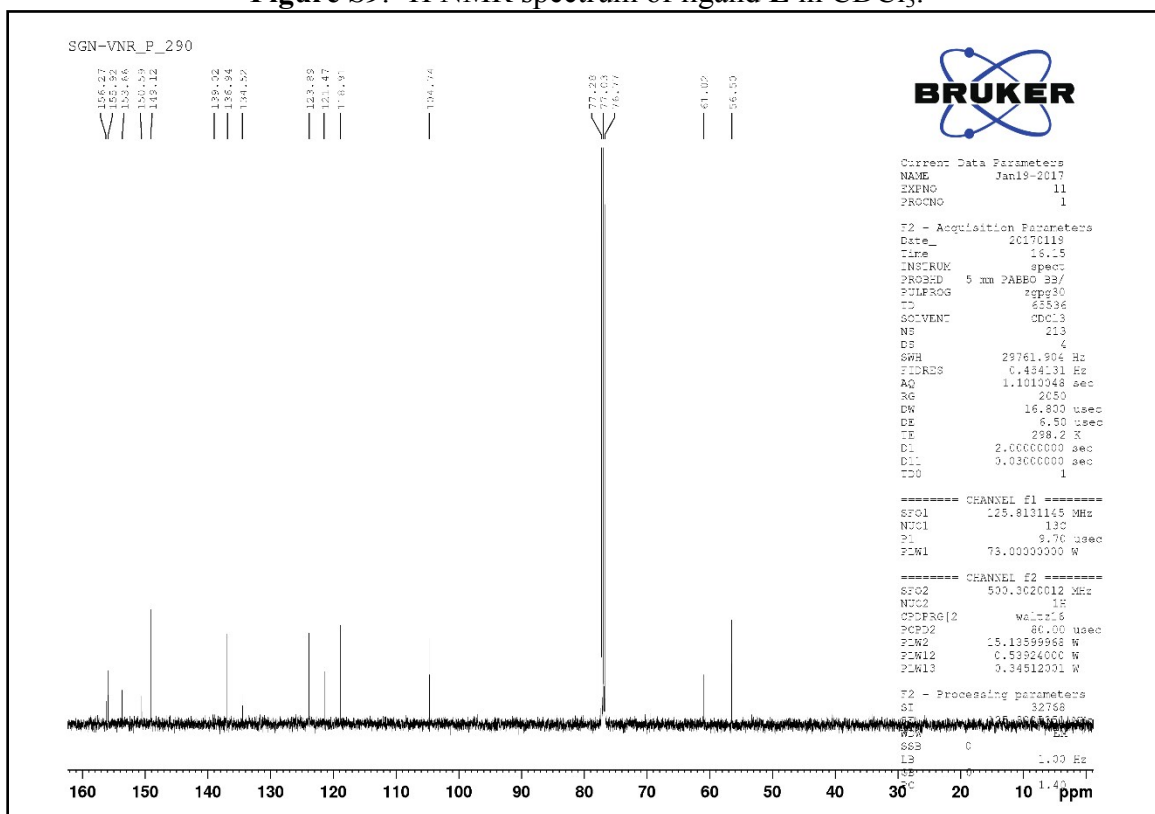

Figure S10.  $^{13}\text{C}$  NMR spectrum of ligand L in  $\text{CDCl}_3$ .

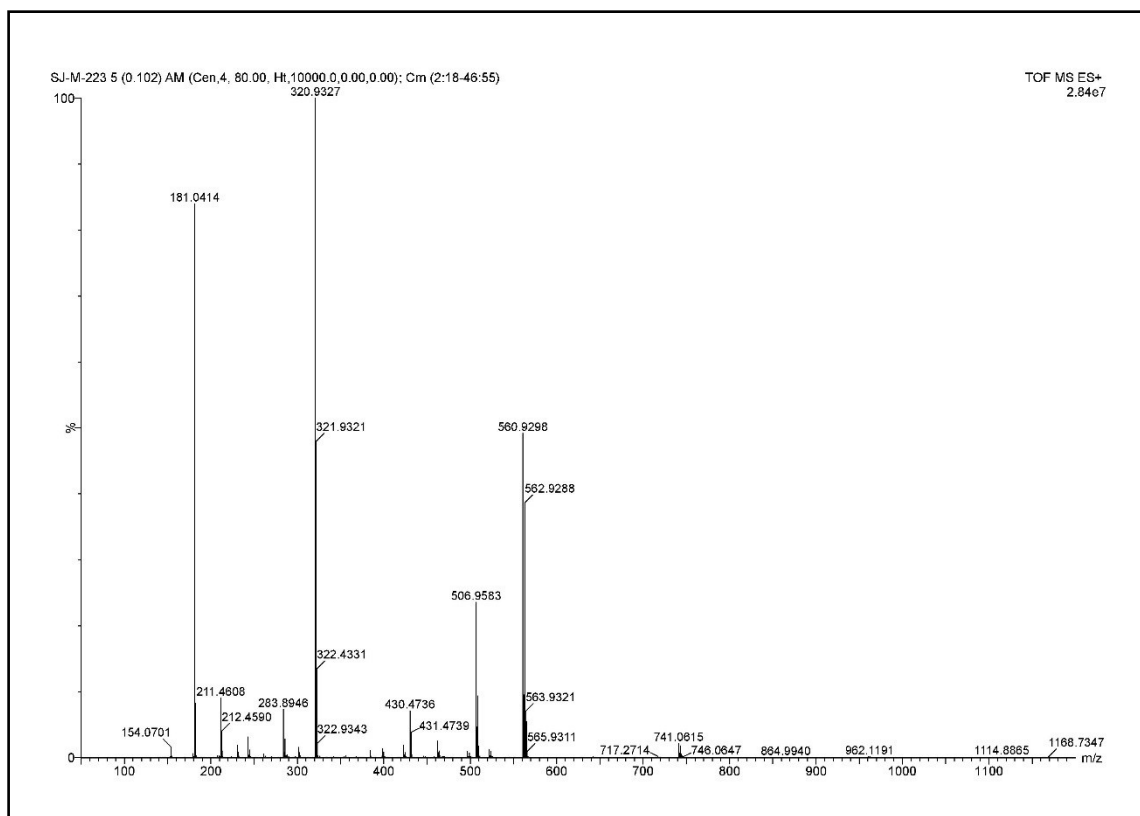

**Figure S11.** ESI-Mass spectrum of **C-I** recorded in MeCN.

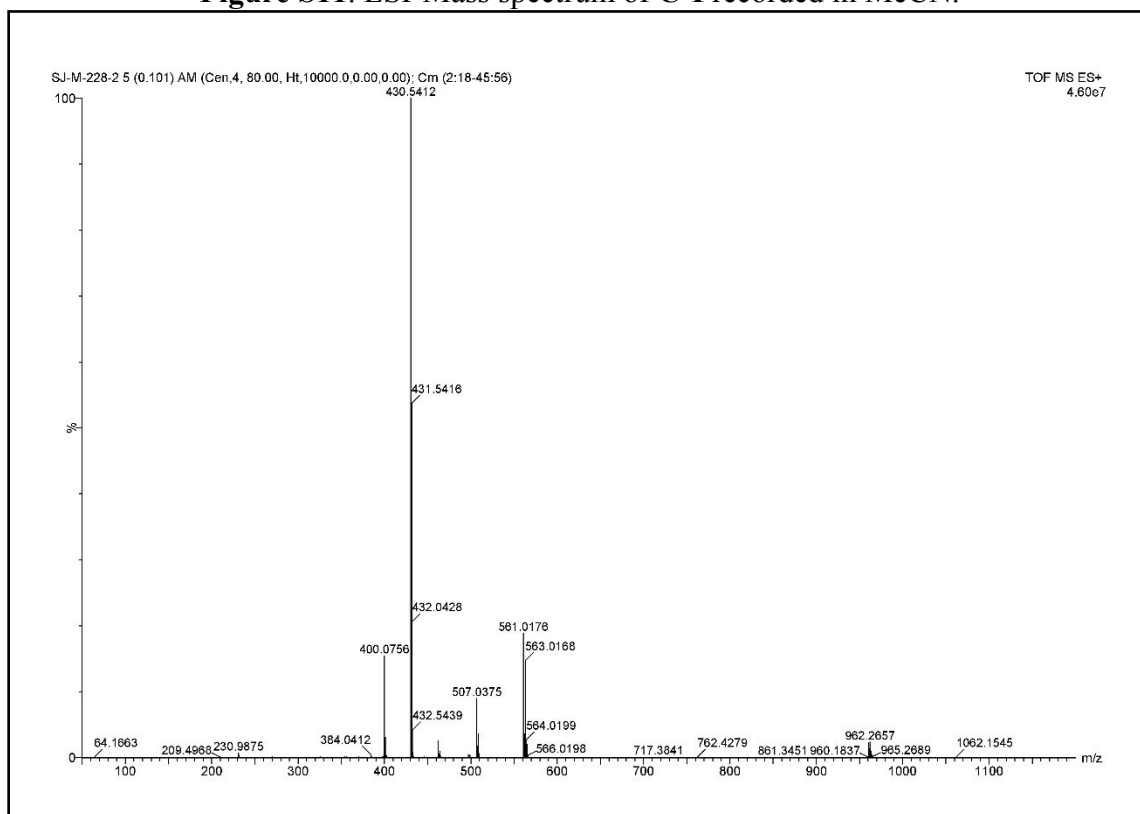

**Figure S12.** ESI-Mass spectrum of **C-II** recorded in MeCN.



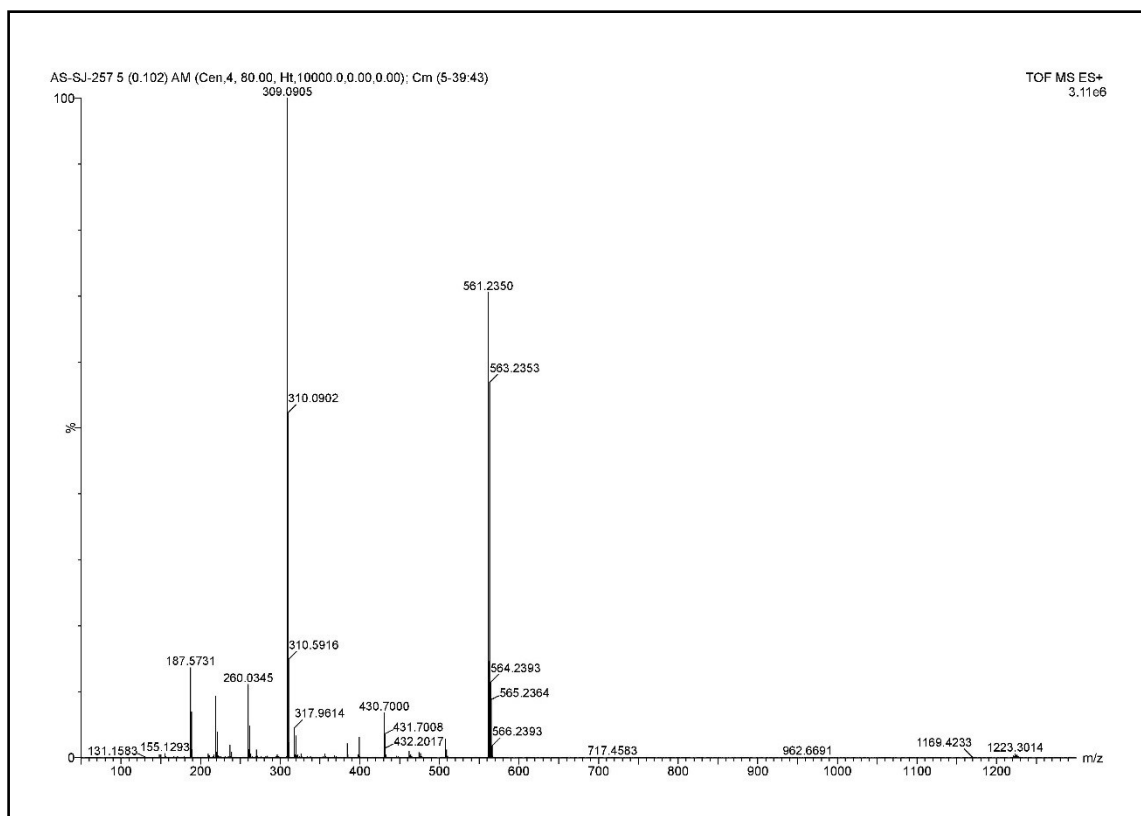

Figure S13. ESI-Mass spectrum of C-III recorded in MeCN.

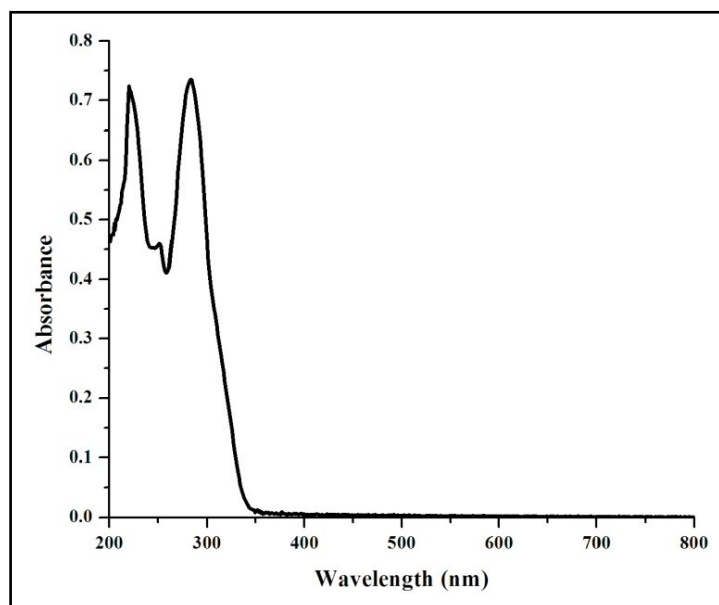

Figure S14. UV-Vis spectrum of L (20  $\mu$ M) in MeCN

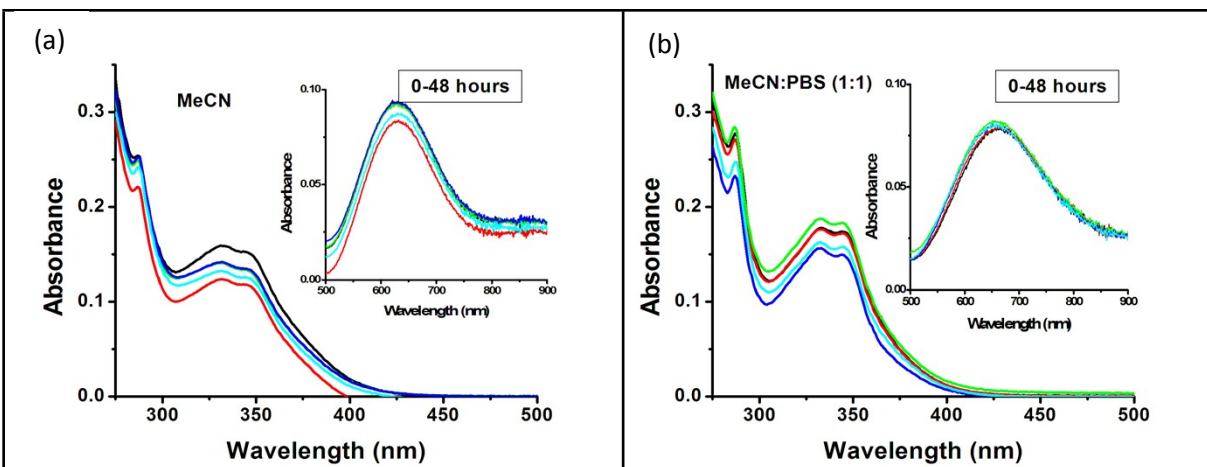

**Figure S15.** UV- Visible absorption spectra of C-I recorded in (a) MeCN and; (b) MeCN:PBS buffer (1:1) upto 48 h at 298 K.

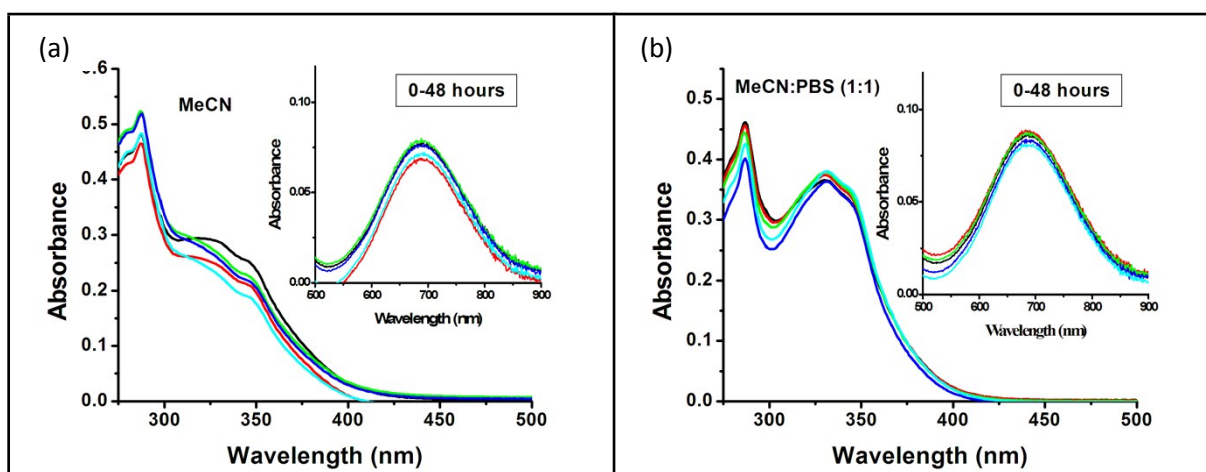

**Figure S16.** UV- Visible absorption spectra of C-II recorded in (a) MeCN and; (b) MeCN:PBS buffer (1:1) upto 48 h at 298 K.

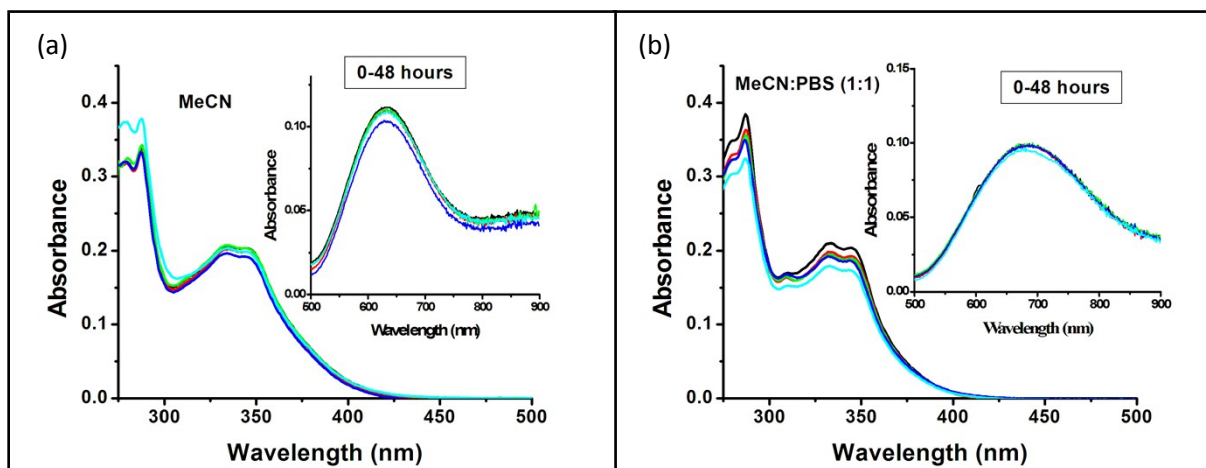

**Figure S17.** UV- Visible absorption spectra of C-III recorded in (a) MeCN and; (b) MeCN:PBS buffer (1:1) upto 48 h at 298 K.

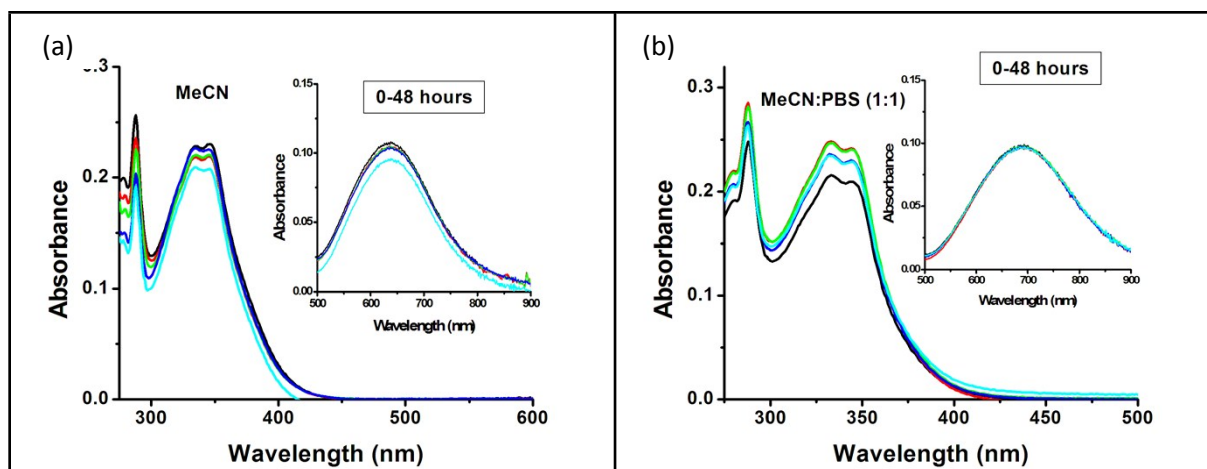

**Figure S18.** UV- Visible absorption spectra of C-IV recorded in (a) MeCN and; (b) MeCN:PBS buffer (1:1) upto 48 h at 298 K

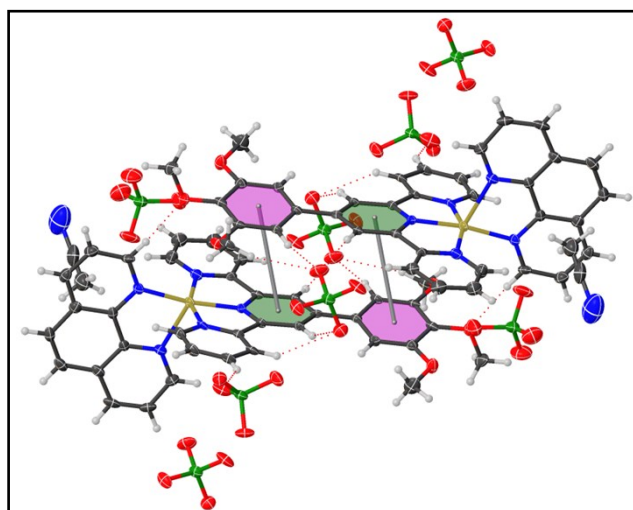

**Figure S19.** Crystal packing of C-I showing  $\pi$ - $\pi$  interaction and H-bonding.

$\pi$ - $\pi$  interactions and hydrogen bond parameters ( $\text{\AA}$ ,  $^\circ$ ) for C-I

| Cg(i)...Cg(j) | Distance | Dihedral angle | Slippage  | Symmetry     |                  |
|---------------|----------|----------------|-----------|--------------|------------------|
| Cg(8)...Cg(9) | 3.974(3) | 14.00          | 1.857     | 1-x, 1-y, -z |                  |
| D-H...A       | D-H      | A...H          | D...A     | <D-A...H     | Symmetry         |
| C1-H1A...O4   | 0.9600   | 2.6000         | 3.531(10) | 164.00       | 1-x,1-y,1-z      |
| C4-H4...O4    | 0.9300   | 2.5200         | 3.422(8)  | 163.00       | 1-x,1-y,1-z      |
| C11-H11...O4  | 0.9300   | 2.4800         | 3.408(7)  | 173.00       | 1-x,1-y,1-z      |
| C19-H19...O7  | 0.9300   | 2.5800         | 3.384(8)  | 145.00       | x,y,-1+z         |
| C24-H24...O7  | 0.9300   | 2.4700         | 3.314(7)  | 150.00       | x,y,-1+z         |
| C26-H26...O6  | 0.9300   | 2.3400         | 3.149(8)  | 146.00       | 1-x,-1/2+y,1/2-z |
| C34-H34...O2  | 0.9300   | 2.5100         | 3.217(8)  | 133.0        | 1-x,1-y,-z       |
| C36-H36...O9  | 0.9300   | 2.6000         | 3.393(9)  | 144.00       | -x,1-y,-z        |

Cg(8): N5-C12-C24-C10-C11-C13; Cg(9): C2-C3-C4-C9-C8-C5

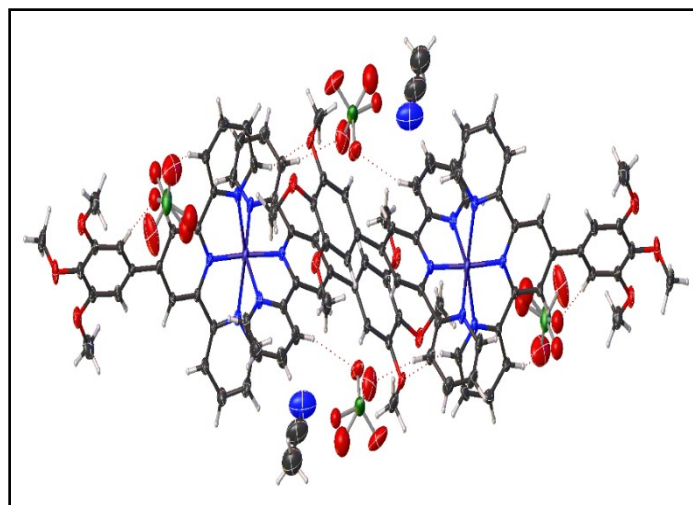

**Figure S20.** Crystal packing of **C-II** showing H-bonding.

Hydrogen bond parameters ( $\text{\AA}$ ,  $^\circ$ ) for **C-II**

| <b>D-H...A</b> | <b>D-H</b> | <b>A...H</b> | <b>D...A</b> | <b>&lt;D-A...H</b> | <b>Symmetry</b> |
|----------------|------------|--------------|--------------|--------------------|-----------------|
| C2-H2A...O10   | 0.9600     | 2.3100       | 2.788(7)     | 110.00             |                 |
| C3-H3A...O3    | 0.9600     | 2.5800       | 3.227(10)    | 125.00             | x,y,1+z         |
| C3-H3B...O11   | 0.9600     | 2.5500       | 3.492(7)     | 166.00             | x,y,1+z         |
| C016-H016...O5 | 0.9300     | 2.5500       | 3.366(10)    | 147.00             |                 |
| C017-H017...O1 | 0.9300     | 2.5500       | 3.468(11)    | 171.00             | 1-x,1-y,1-z     |
| C01B-H01B...O3 | 0.9300     | 2.5800       | 3.486(9)     | 166.00             | x,y,1+z         |
| C01E-H01E...O8 | 0.9300     | 2.4100       | 3.181(7)     | 140.0              | 1-x,1-y,2-z     |
| C01N-H01N...O3 | 0.9300     | 2.4400       | 3.219(12)    | 141.00             | 2-x,2-y,1-z     |

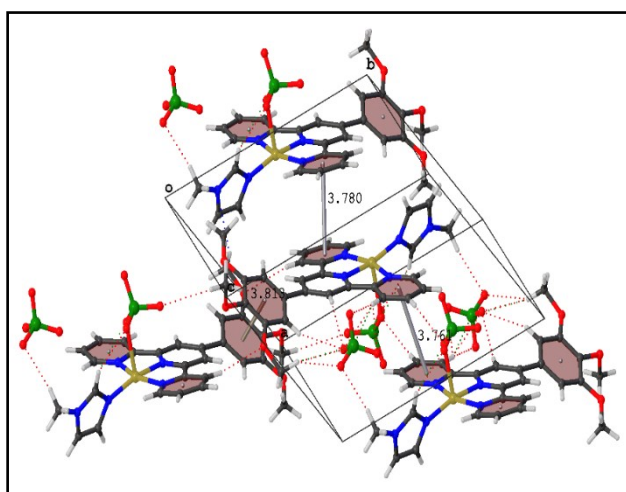

**Figure S21.** Crystal packing of **C-IV** showing  $\pi$ - $\pi$  interaction and H-bonding.

$\pi$ - $\pi$  interactions and hydrogen bond parameters ( $\text{\AA}$ ,  $^\circ$ ) for C-IV

| Cg(i)...Cg(j) | Distance   | Dihedral angle | Slippage | Symmetry    |             |
|---------------|------------|----------------|----------|-------------|-------------|
| Cg(4)...Cg(4) | 3.761(2)   | 0.00           | 1.844    | 2-x,1-y,1-z |             |
| Cg(6)...Cg(6) | 3.7803(18) | 0.00           | 1.839    | 1-x,1-y,-z  |             |
| Cg(7)...Cg(7) | 3.8130(19) | 0.00           | 1.457    | 1-x,-y,1-z  |             |
| D-H...A       | D-H        | A...H          | D...A    | <D-A...H    | Symmetry    |
| C7-H7...O11   | 0.9300     | 2.5900         | 3.427(6) | 150.00      | 2-x,1-y,1-z |
| C14-H14...O3  | 0.9300     | 2.5900         | 3.517(4) | 172.00      | -1+x,y,z    |
| C21-H21...O4  | 0.9300     | 2.3800         | 3.093(4) | 133.00      | 2-x,1-y,-z  |
| C24-H24A...O7 | 0.9600     | 2.4400         | 3.223(6) | 139.00      | -x,-y,1-z   |
| C25-H25...O4  | 0.9300     | 2.4500         | 3.285(5) | 149.00      |             |
| C28-H28B...O9 | 0.9600     | 2.5700         | 3.482(6) | 160.00      |             |
| C28-H28C...O2 | 0.9600     | 2.4700         | 3.425(5) | 173.0       | 2-x,1-y,-z  |

Cg(4): N1-C1-C2-C3-C4-C5; Cg(6): N3-C17-C18-C19-C20-C21; Cg(7): C9-C10-C11-C12-C13-C14

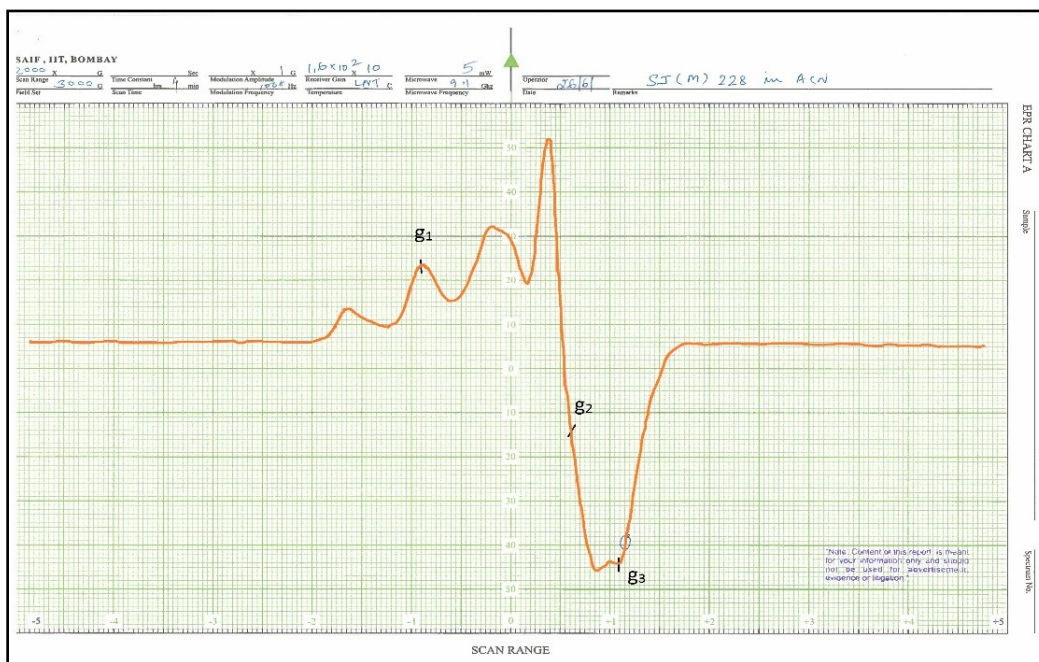

**Figure S22.** X-band EPR spectrum of complex C-II in MeCN glass at 77 K (frequency 9.1 GHz and 100 kHz field).



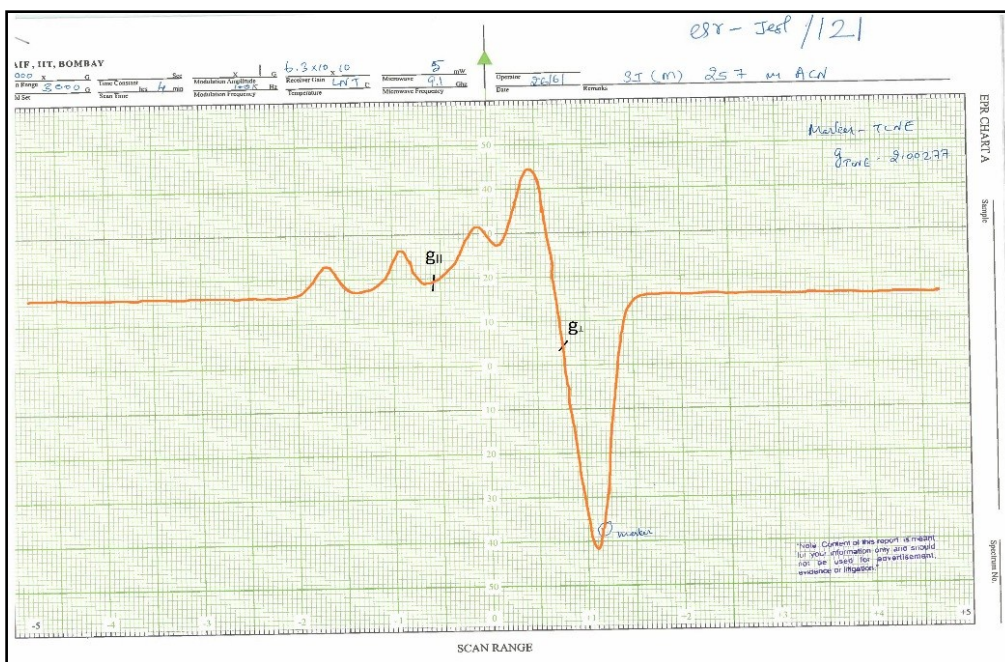

**Figure S23.** X-band EPR spectrum of complex **C-III** in MeCN glass at 77 K (frequency 9.1 GHz and 100 kHz field).

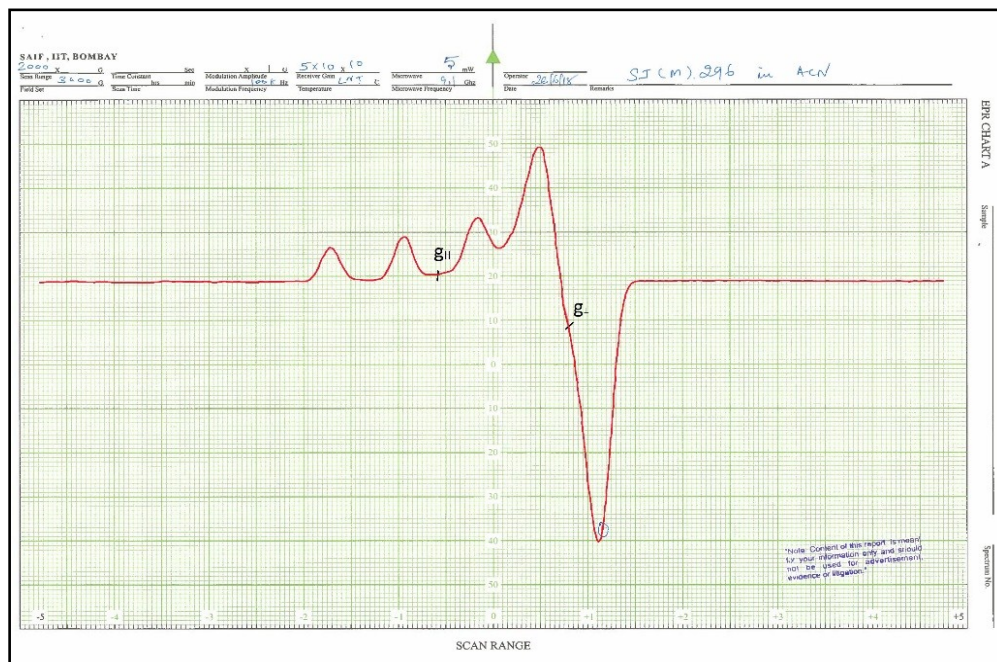

**Figure S24.** X-band EPR spectrum of complex **C-IV** in MeCN glass at 77 K (frequency 9.1 GHz and 100 kHz field).

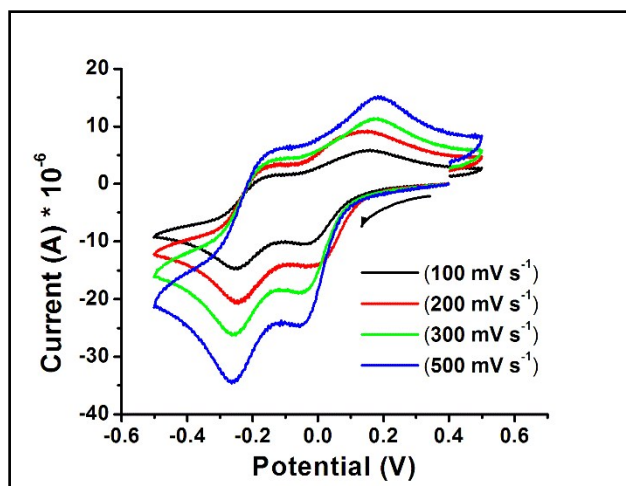

**Figure S25.** Cyclic voltammogram of C-I (1 mM) solution in dry  $\text{CH}_3\text{CN}$  and 0.1 M TBAP as supporting electrolyte vs. Ag wire at varying scan rates.

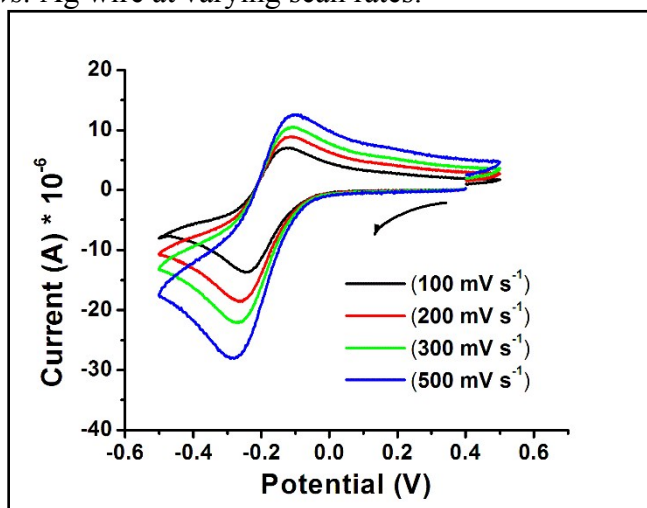

**Figure S26.** Cyclic voltammogram of C-II (1 mM) solution in dry  $\text{CH}_3\text{CN}$  and 0.1 M TBAP as supporting electrolyte vs. Ag wire at varying scan rates.

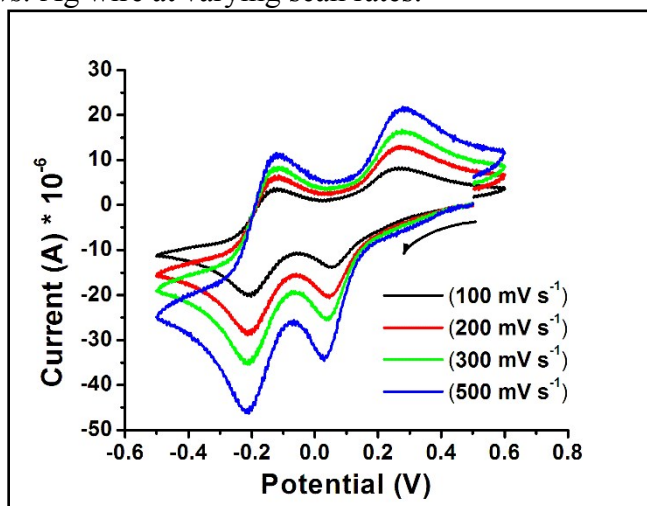

**Figure S27.** Cyclic voltammogram of C-III (1 mM) solution in dry  $\text{CH}_3\text{CN}$  and 0.1 M TBAP as supporting electrolyte vs. Ag wire at varying scan rates.

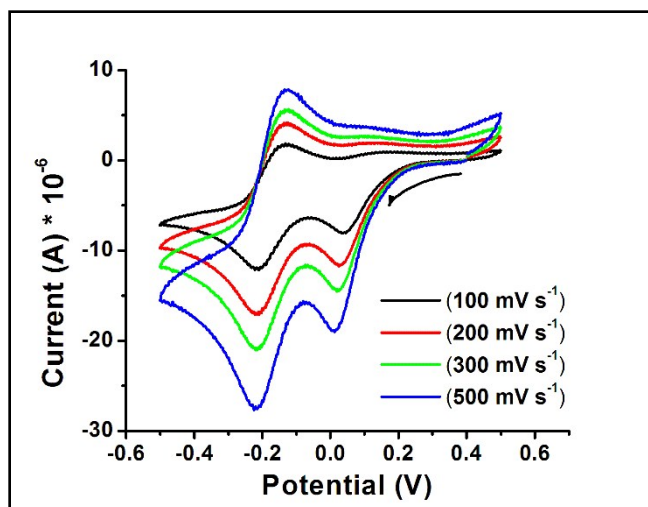

**Figure S28.** Cyclic voltammogram of **C-IV** (1 mM) solution in dry  $\text{CH}_3\text{CN}$  and 0.1 M TBAP as supporting electrolyte vs. Ag wire at varying scan rates.

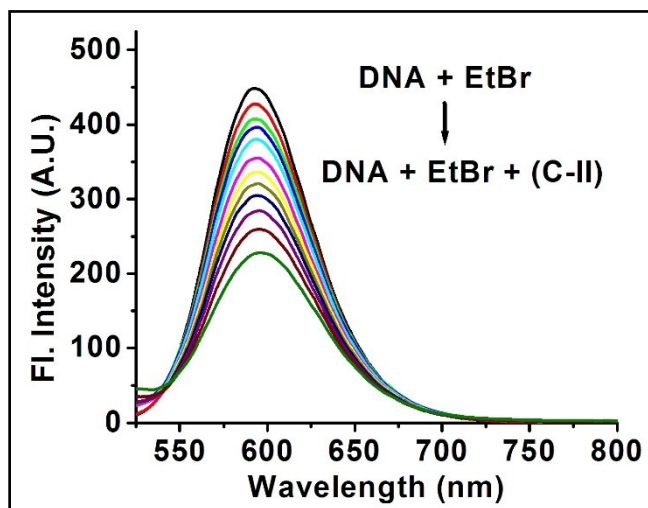

**Figure S29.** Plot of fluorescence emission intensity  $I$  versus wavelength  $\lambda$  for DNA-EtBr at different concentrations of **C-II**. The arrow shows the change in intensity of emission on increasing amount of the complex from 0 to 50  $\mu\text{M}$ .



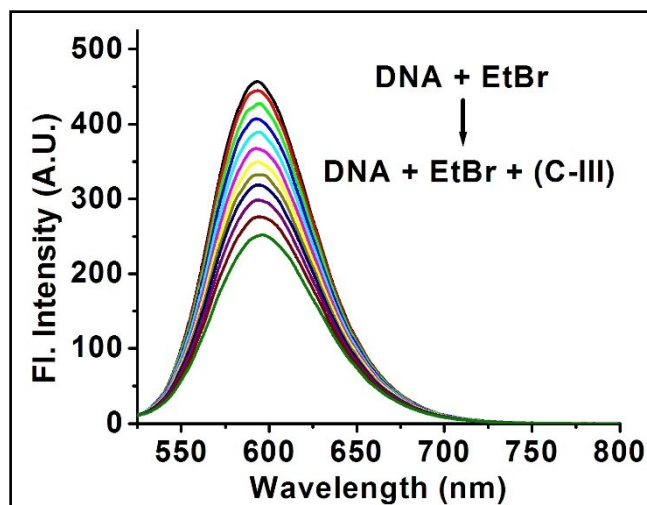

**Figure S30.** Plot of fluorescence emission intensity  $I$  versus wavelength  $\lambda$  for DNA-EtBr at different concentrations of C-III. The arrow shows the change in intensity of emission on increasing amount of the complex from 0 to 50  $\mu\text{M}$ .

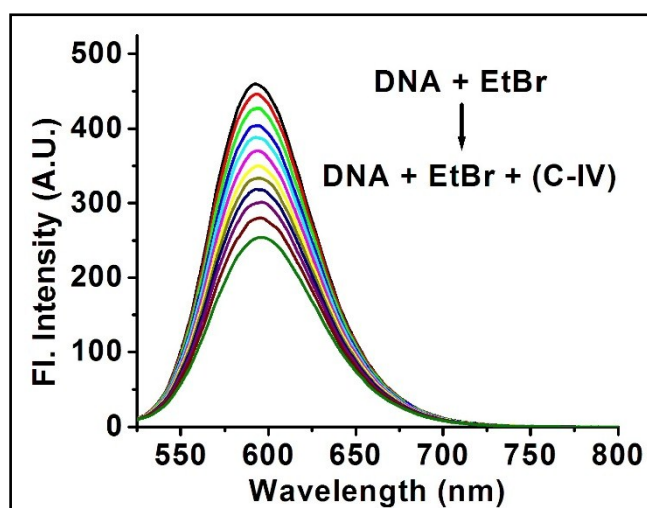

**Figure S31.** Plot of fluorescence emission intensity  $I$  versus wavelength  $\lambda$  for DNA-EtBr at different concentrations of C-IV. The arrow shows the change in intensity of emission on increasing amount of the complex from 0 to 50  $\mu\text{M}$ .

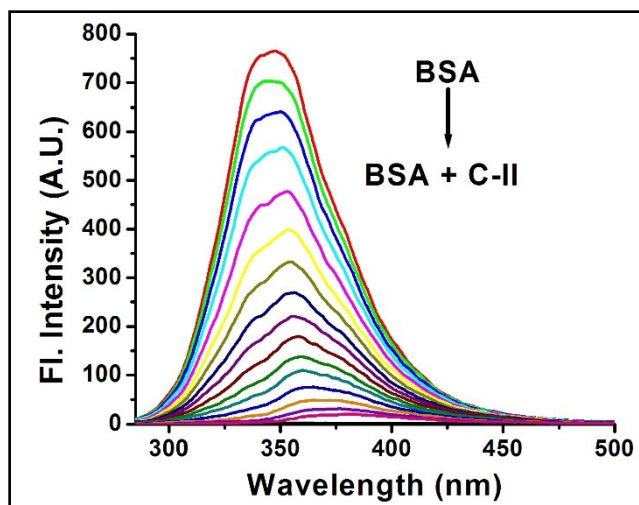

**Figure S32.** Plot of fluorescence emission intensity  $I$  versus wavelength  $\lambda$  for BSA at different concentrations of C-II. The arrow shows the change in intensity of emission on increasing amount of the complex from 0 to around 50  $\mu\text{M}$ .

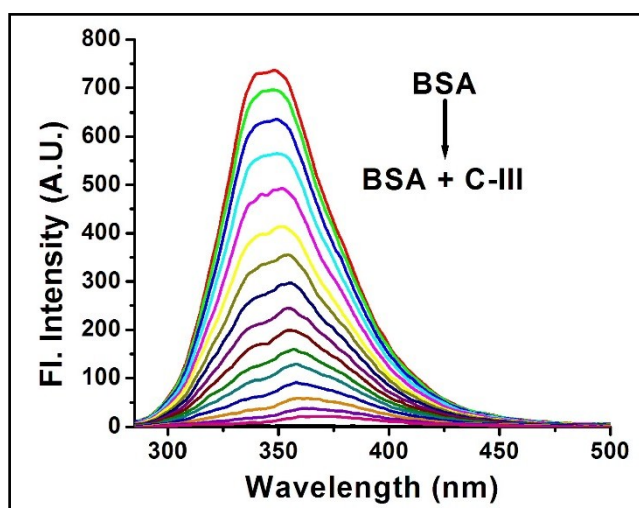

**Figure S33.** Plot of fluorescence emission intensity  $I$  versus wavelength  $\lambda$  for BSA at different concentrations of C-III. The arrow shows the change in intensity of emission on increasing amount of the complex from 0 to around 50  $\mu\text{M}$ .

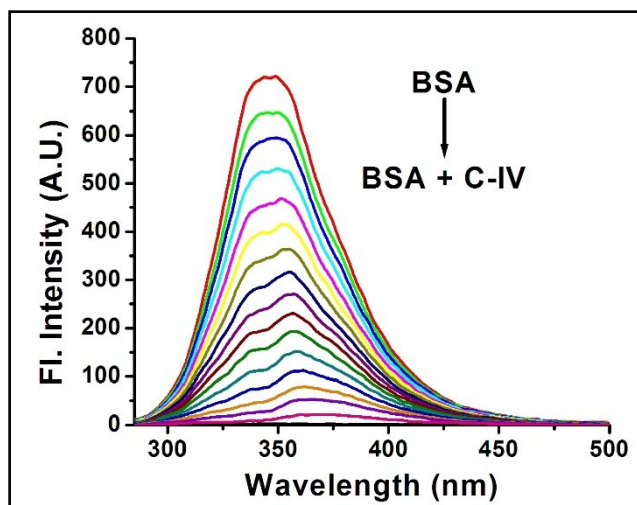

**Figure S34.** Plot of fluorescence emission intensity  $I$  versus wavelength  $\lambda$  for BSA at different concentrations of C-IV. The arrow shows the change in intensity of emission on increasing amount of the complex from 0 to around 50  $\mu\text{M}$ .

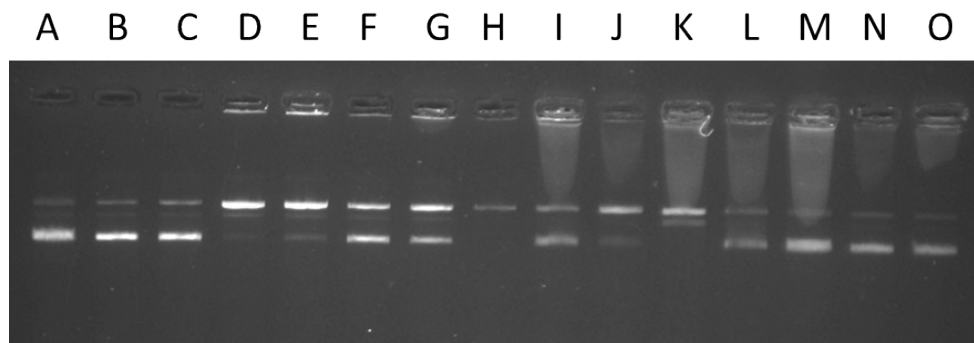

**Figure S35.** Agarose gel electrophoresis for complexes C-I to C-IV showing DNA aggregation in presence of  $\text{H}_2\text{O}_2$ . Lane A: DNA only; Lane B: Buffer control; Lane C:  $\text{H}_2\text{O}_2$  (500  $\mu\text{M}$ ) control; Lane D: C-I (500  $\mu\text{M}$ ) control; Lane E: C-II (500  $\mu\text{M}$ ) control; Lane F: C-III (500  $\mu\text{M}$ ) control; Lane G: C-IV (500  $\mu\text{M}$ ) control; Lane H: C-I (100  $\mu\text{M}$ ) +  $\text{H}_2\text{O}_2$  (500  $\mu\text{M}$ ); Lane I: C-II (100  $\mu\text{M}$ ) +  $\text{H}_2\text{O}_2$  (500  $\mu\text{M}$ ); Lane J: C-III (100  $\mu\text{M}$ ) +  $\text{H}_2\text{O}_2$  (500  $\mu\text{M}$ ); Lane K: C-IV (100  $\mu\text{M}$ ) +  $\text{H}_2\text{O}_2$  (500  $\mu\text{M}$ ); Lane L: C-I (500  $\mu\text{M}$ ) +  $\text{H}_2\text{O}_2$  (500  $\mu\text{M}$ ); Lane M: C-II (500  $\mu\text{M}$ ) +  $\text{H}_2\text{O}_2$  (500  $\mu\text{M}$ ); Lane N: C-III (500  $\mu\text{M}$ ) +  $\text{H}_2\text{O}_2$  (500  $\mu\text{M}$ ); Lane O: C-IV (500  $\mu\text{M}$ ) +  $\text{H}_2\text{O}_2$  (500  $\mu\text{M}$ )

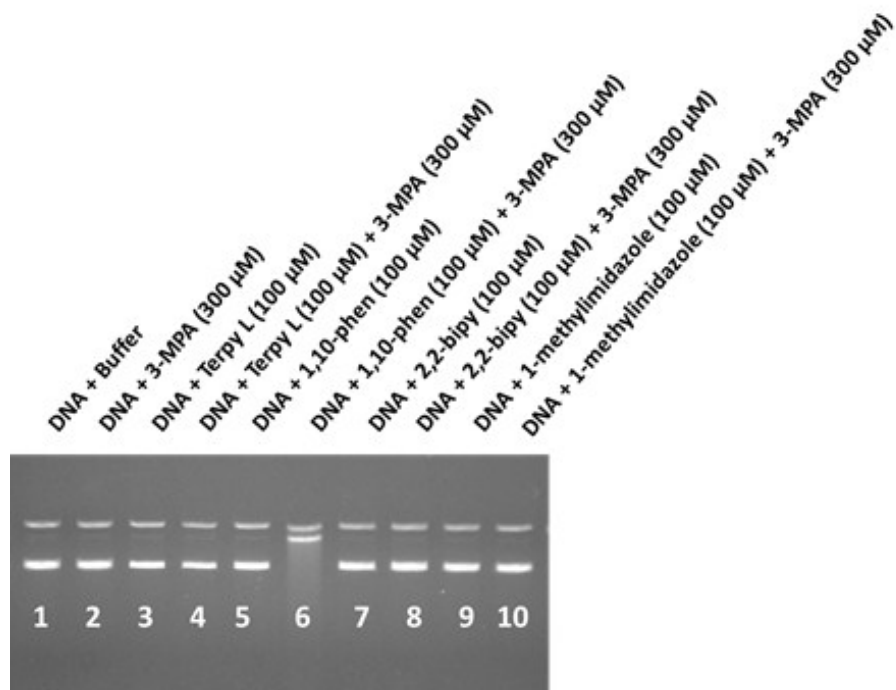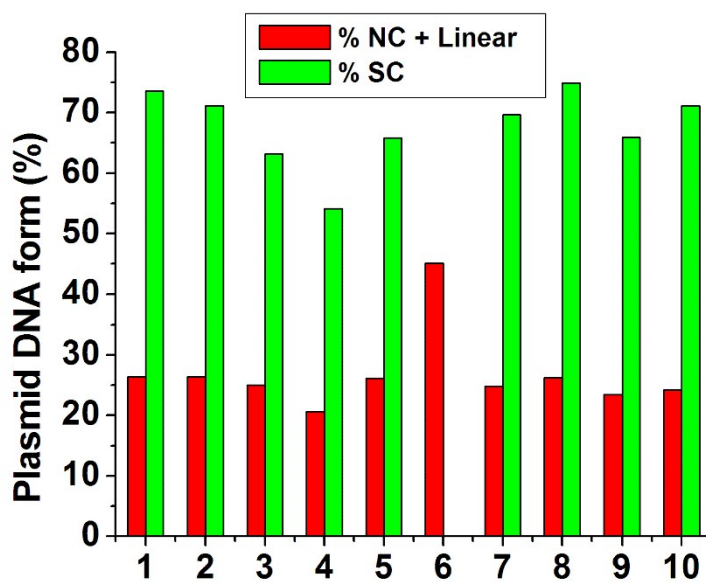

**Figure S36.** (Top): Agarose gel electrophoresis for terpyridine ligand (L) and co-ligands (1,10-phenanthroline, 2,2'-bipyridine, 3-methylimidazole) in absence and presence of 3-MPA; (Bottom): % Plasmid DNA form present in each lane.

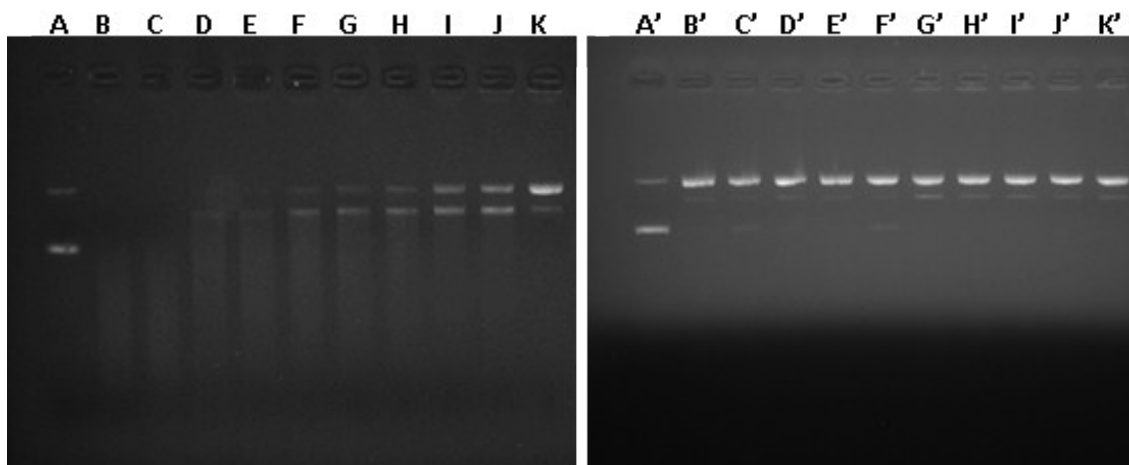

**Figure S37 (Left):** Gel electrophoresis diagram showing chemical nuclease activity of **C-I** to **C-IV** in the presence of various controls. Lane A: Buffer control; Lane B: DNA + **C-I** (100  $\mu\text{M}$ ) + MPA (500  $\mu\text{M}$ ); Lane C: DNA + **C-I** (100  $\mu\text{M}$ ) + MPA (500  $\mu\text{M}$ ) +  $\text{D}_2\text{O}$  (2.5 mM); Lane D: DNA + **C-I** (100  $\mu\text{M}$ ) + MPA (500  $\mu\text{M}$ ) + DMSO (2.5 mM); Lane E: DNA + **C-I** (100  $\mu\text{M}$ ) + MPA (500  $\mu\text{M}$ ) +  $\text{NaN}_3$  (2.5 mM); Lane F: DNA + **C-I** (100  $\mu\text{M}$ ) + MPA (500  $\mu\text{M}$ ) + KI (2.5 mM); Lane G: DNA + **C-II** (100  $\mu\text{M}$ ) + MPA (500  $\mu\text{M}$ ); Lane H: DNA + **C-II** (100  $\mu\text{M}$ ) + MPA (500  $\mu\text{M}$ ) +  $\text{D}_2\text{O}$  (2.5 mM); Lane I: DNA + **C-II** (100  $\mu\text{M}$ ) + MPA (500  $\mu\text{M}$ ) + DMSO (2.5 mM); Lane J: DNA + **C-II** (100  $\mu\text{M}$ ) + MPA (500  $\mu\text{M}$ ) +  $\text{NaN}_3$  (2.5 mM); Lane K: DNA + **C-II** (100  $\mu\text{M}$ ) + MPA (500  $\mu\text{M}$ ) + KI (2.5 mM).

**(Right):** Lane A': Buffer control; Lane B': DNA + **C-III** (100  $\mu\text{M}$ ) + MPA (500  $\mu\text{M}$ ); Lane C': DNA + **C-III** (100  $\mu\text{M}$ ) + MPA (500  $\mu\text{M}$ ) +  $\text{D}_2\text{O}$  (2.5 mM); Lane D': DNA + **C-III** (100  $\mu\text{M}$ ) + MPA (500  $\mu\text{M}$ ) + DMSO (2.5 mM); Lane E': DNA + **C-III** (100  $\mu\text{M}$ ) + MPA (500  $\mu\text{M}$ ) +  $\text{NaN}_3$  (2.5 mM); Lane F': DNA + **C-III** (100  $\mu\text{M}$ ) + MPA (500  $\mu\text{M}$ ) + KI (2.5 mM); Lane G': DNA + **C-IV** (100  $\mu\text{M}$ ) + MPA (500  $\mu\text{M}$ ); Lane H': DNA + **C-IV** (100  $\mu\text{M}$ ) + MPA (500  $\mu\text{M}$ ) +  $\text{D}_2\text{O}$  (2.5 mM); Lane I': DNA + **C-IV** (100  $\mu\text{M}$ ) + MPA (500  $\mu\text{M}$ ) + DMSO (2.5 mM); Lane J': DNA + **C-IV** (100  $\mu\text{M}$ ) + MPA (500  $\mu\text{M}$ ) +  $\text{NaN}_3$  (2.5 mM); Lane K': DNA + **C-IV** (100  $\mu\text{M}$ ) + MPA (500  $\mu\text{M}$ ) + KI (2.5 mM).

**Table S1.** Consolidated characterization data for copper(II) complexes (**C-I** - **C-IV**).

| Complex     | FTIR, $\text{cm}^{-1}$<br>(KBr disc)                         | $\lambda_{\text{max}}$ , nm ( $\epsilon$ ,<br>$\text{M}^{-1} \text{cm}^{-1}$ ) (in<br>MeCN)                | ESI-MS $m/z$<br>found<br>(calculated):<br>[( $\text{M}^{2+}$ -<br>$2\text{ClO}_4$ )/2] in<br>MeCN | CHN<br>found<br>(calculated)                        | Conductance<br>( $\text{S}\cdot\text{cm}^{-1}\text{M}^{-1}$ ) |
|-------------|--------------------------------------------------------------|------------------------------------------------------------------------------------------------------------|---------------------------------------------------------------------------------------------------|-----------------------------------------------------|---------------------------------------------------------------|
| <b>C-I</b>  | 3000 (w),<br>1600 (m),<br>1404 (m),<br>1085 (vs), 622<br>(m) | 223 ( $7.5 \times 10^4$ ); 270 ( $5.1 \times 10^4$ ); 330 ( $1.9 \times 10^4$ ); 690 ( $1.2 \times 10^2$ ) | 320.933<br>(321.080)                                                                              | C=51.87 (51.35);<br>H=3.68 (3.47);<br>N=8.03 (8.32) | 310                                                           |
| <b>C-II</b> | 2945 (w),                                                    | 222 ( $8.4 \times$                                                                                         | 430.541                                                                                           | C=54.69 (54.32);                                    | 280                                                           |

|                             |                                                                           |                                                                                                                                                          |                       |                                                     |     |
|-----------------------------|---------------------------------------------------------------------------|----------------------------------------------------------------------------------------------------------------------------------------------------------|-----------------------|-----------------------------------------------------|-----|
|                             | 1610 (m),<br>1480 (m),<br>1090 (vs), 620<br>(m)                           | 10 <sup>4</sup> ); 265 (4.0<br>x 10 <sup>4</sup> ); 287<br>(3.8 x 10 <sup>4</sup> );<br>332 (3.9 x<br>10 <sup>4</sup> ); 689 (8.7<br>x 10 <sup>1</sup> ) | (430.625)             | H=4.09 (3.99);<br>N=7.22 (7.72)                     |     |
| <b>C-III.H<sub>2</sub>O</b> | 3520 (w),<br>3070 (w),<br>1605 (m),<br>1405 (m),<br>1090 (vs), 625<br>(m) | 222 (6.3 x<br>10 <sup>4</sup> ); 288 (3.3<br>x 10 <sup>4</sup> ); 340<br>(2.0 x 10 <sup>4</sup> );<br>637 (1.1 x<br>10 <sup>2</sup> )                    | 309.0905<br>(309.080) | C=48.54 (48.84);<br>H=3.42 (3.74);<br>N=8.72 (8.38) | 350 |
| <b>C-IV</b>                 | 2935 (w),<br>1605 (m),<br>1405 (m),<br>1100 (vs), 620<br>(m)              | 222 (5.7 x<br>10 <sup>4</sup> ); 288 (2.0<br>x 10 <sup>4</sup> ); 340<br>(1.9 x 10 <sup>4</sup> );<br>640 (1.1 x<br>10 <sup>2</sup> )                    | ----                  | C=45.02 (45.20);<br>H=3.59 (3.66);<br>N=9.89 (9.41) | 320 |

**Table S2:** Summary of crystal data for complexes **C-I**, **C-II** and **C-IV**

| <b>Compound</b>                                                                             | <b>C-I</b>                                                                                      | <b>C-II</b>                                                                      | <b>C-IV</b>                                                                      |
|---------------------------------------------------------------------------------------------|-------------------------------------------------------------------------------------------------|----------------------------------------------------------------------------------|----------------------------------------------------------------------------------|
| Formula                                                                                     | C <sub>76</sub> H <sub>64</sub> Cl <sub>4</sub> Cu <sub>2</sub> N <sub>12</sub> O <sub>22</sub> | C <sub>50</sub> H <sub>45</sub> Cl <sub>2</sub> CuN <sub>7</sub> O <sub>14</sub> | C <sub>28</sub> H <sub>27</sub> Cl <sub>2</sub> CuN <sub>5</sub> O <sub>11</sub> |
| Formula weight/ g.mol <sup>-1</sup>                                                         | 1766.27                                                                                         | 1102.36                                                                          | 743.98                                                                           |
| T (K)                                                                                       | 296(2)                                                                                          | 296(2)                                                                           | 293(2)                                                                           |
| Crystal system                                                                              | Monoclinic                                                                                      | Triclinic                                                                        | Triclinic                                                                        |
| Space group                                                                                 | P2 <sub>1</sub> /c                                                                              | p $\bar{1}$                                                                      | p $\bar{1}$                                                                      |
| <i>a</i> /Å                                                                                 | 19.078(5)                                                                                       | 9.6483(4)                                                                        | 9.1079(4)                                                                        |
| <i>b</i> /Å                                                                                 | 12.031(3)                                                                                       | 12.9618(6)                                                                       | 12.5746(4)                                                                       |
| <i>c</i> /Å                                                                                 | 17.935(4)                                                                                       | 20.9170(9)                                                                       | 14.8504(7)                                                                       |
| $\alpha$ /°                                                                                 | 90                                                                                              | 91.460(3)                                                                        | 70.650(4)                                                                        |
| $\beta$ /°                                                                                  | 113.406(12)                                                                                     | 100.086(3)                                                                       | 88.016(4)                                                                        |
| $\gamma$ /°                                                                                 | 90                                                                                              | 107.065(3)                                                                       | 73.255(4)                                                                        |
| V/Å <sup>3</sup>                                                                            | 3778.0(16)                                                                                      | 2453.82(19)                                                                      | 1533.18(12)                                                                      |
| <i>Z</i>                                                                                    | 2                                                                                               | 2                                                                                | 2                                                                                |
| $\rho_{\text{calcd}}$ (mg/m <sup>3</sup> )                                                  | 1.553                                                                                           | 1.436                                                                            | 1.612                                                                            |
| Absorption coefficient ( $\mu$ )<br>(mm <sup>-1</sup> )                                     | 0.791                                                                                           | 0.627                                                                            | 0.956                                                                            |
| F (000)                                                                                     | 1812                                                                                            | 1094                                                                             | 762                                                                              |
| R (int)                                                                                     | 0.2052                                                                                          | 0.0223                                                                           | 0.0198                                                                           |
| Data/restraints/parameters                                                                  | 6633 / 0 / 527                                                                                  | 8613 / 0 / 674                                                                   | 5385 / 0 / 424                                                                   |
| Goodness-of-fit on <i>F</i> <sup>2</sup>                                                    | 1.117                                                                                           | 1.169                                                                            | 1.057                                                                            |
| Final R indices [ <i>I</i> >2 $\sigma$ ( <i>I</i> )]<br>(R <sub>1</sub> , wR <sub>2</sub> ) | 0.0825, 0.2189                                                                                  | 0.0768, 0.1962                                                                   | 0.0427, 0.1152                                                                   |
| R indices (all data) (R <sub>1</sub> , wR <sub>2</sub> )                                    | 0.0989, 0.2326                                                                                  | 0.0860, 0.2029                                                                   | 0.0486, 0.1208                                                                   |
| Largest diff. peak and hole                                                                 | 0.917 and -1.087                                                                                | 1.386 and -0.578                                                                 | 0.911 and -0.518                                                                 |

|                      |  |  |  |
|----------------------|--|--|--|
| (e.Å <sup>-3</sup> ) |  |  |  |
|----------------------|--|--|--|

**Table S3.** Selected bond lengths (Å) and bond angles (°) for complexes **C-I**, **C-II** and **C-IV**

| <b>C-I</b>     |          |                  |            |                  |            |
|----------------|----------|------------------|------------|------------------|------------|
| Selected bonds |          | Selected angles  |            |                  |            |
| Cu(1)-N(5)     | 1.944(4) | N(5)-Cu(1)-N(1)  | 170.58(19) | N(4)-Cu(1)-N(3)  | 158.5(2)   |
| Cu(1)-N(1)     | 2.000(5) | N(5)-Cu(1)-N(4)  | 79.48(19)  | N(5)-Cu(1)-N(2)  | 109.36(18) |
| Cu(1)-N(4)     | 2.044(5) | N(1)-Cu(1)-N(4)  | 100.5(2)   | N(1)-Cu(1)-N(2)  | 79.98(19)  |
| Cu(1)-N(3)     | 2.045(5) | N(5)-Cu(1)-N(3)  | 80.61(19)  | N(4)-Cu(1)-N(2)  | 99.88(19)  |
| Cu(1)-N(2)     | 2.215(5) | N(1)-Cu(1)-N(3)  | 97.77(19)  | N(3)-Cu(1)-N(2)  | 94.38(18)  |
| <b>C-II</b>    |          |                  |            |                  |            |
| Selected bonds |          | Selected angles  |            |                  |            |
| Cu(01)-N(2)    | 1.947(4) | N(2)-Cu(01)-N(5) | 176.74(16) | N(2)-Cu(01)-N(6) | 103.24(16) |
| Cu(01)-N(5)    | 1.998(4) | N(2)-Cu(01)-N(3) | 78.62(16)  | N(5)-Cu(01)-N(6) | 76.49(15)  |
| Cu(01)-N(3)    | 2.109(5) | N(5)-Cu(01)-N(3) | 104.63(16) | N(3)-Cu(01)-N(6) | 94.14(17)  |
| Cu(01)-N(1)    | 2.112(4) | N(2)-Cu(01)-N(1) | 78.64(16)  | N(1)-Cu(01)-N(6) | 89.75(17)  |
| Cu(01)-N(6)    | 2.223(4) | N(5)-Cu(01)-N(1) | 98.11(16)  | N(2)-Cu(01)-N(4) | 103.42(16) |
| Cu(01)-N(4)    | 2.240(4) | N(3)-Cu(01)-N(1) | 157.22(16) | N(5)-Cu(01)-N(4) | 76.97(15)  |
|                |          | N(3)-Cu(01)-N(4) | 89.75(17)  | N(1)-Cu(01)-N(4) | 96.80(17)  |
|                |          | N(6)-Cu(01)-N(4) | 153.30(15) |                  |            |
| <b>C-IV</b>    |          |                  |            |                  |            |
| Selected bonds |          | Selected angles  |            |                  |            |
| Cu(01)-N(2)    | 1.923(2) | N(2)-Cu(01)-N(4) | 167.10(11) | N(3)-Cu(01)-N(1) | 159.88(10) |
| Cu(01)-N(4)    | 1.950(2) | N(2)-Cu(01)-N(3) | 80.20(9)   | N(2)-Cu(01)-O(1) | 95.26(10)  |
| Cu(01)-N(3)    | 2.025(2) | N(4)-Cu(01)-N(3) | 101.98(10) | N(4)-Cu(01)-O(1) | 97.25(10)  |
| Cu(01)-N(1)    | 2.035(3) | N(2)-Cu(01)-N(1) | 79.75(10)  | N(3)-Cu(01)-O(1) | 94.06(9)   |
| Cu(01)-O(1)    | 2.389(2) | N(4)-Cu(01)-N(1) | 97.94(11)  | N(1)-Cu(01)-O(1) | 86.17(9)   |

**Table S4.** Summary of IC<sub>50</sub> values for similar Cu(II) complexes in cancer cell line.

| Complex                                         | IC <sub>50</sub> (μM)                                    | Ref. |
|-------------------------------------------------|----------------------------------------------------------|------|
| <br><chem>[Cu(terpy)(ClO4)2(H2O)]</chem> (1)    | (1) 1.9 ± 0.1 <sup>a</sup><br>(2) 1.2 ± 0.1 <sup>a</sup> | 1    |
| <br><chem>[Cu(terpy)2](CF3SO3)2·2H2O</chem> (2) |                                                          |      |

|                                                                                                                                                                         |                                                                                                                                                                                                                                                                                                                                                                                                                                                                                                                                                                                                                                                                                                                                           |   |
|-------------------------------------------------------------------------------------------------------------------------------------------------------------------------|-------------------------------------------------------------------------------------------------------------------------------------------------------------------------------------------------------------------------------------------------------------------------------------------------------------------------------------------------------------------------------------------------------------------------------------------------------------------------------------------------------------------------------------------------------------------------------------------------------------------------------------------------------------------------------------------------------------------------------------------|---|
| 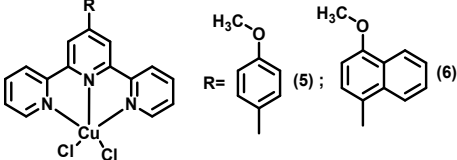                                                                                       | <p>(5) <math>1.02 \pm 0.04^b</math><br/> <math>2.54 \pm 0.05^c</math><br/> (6) <math>0.40 \pm 0.06^b</math><br/> <math>0.95 \pm 0.05^c</math></p>                                                                                                                                                                                                                                                                                                                                                                                                                                                                                                                                                                                         | 2 |
|                                                                                        | <p>(1) <math>17.3 \pm 0.3^b</math>   <math>20.5 \pm 0.2^a</math>   <math>43 \pm 0.3^d</math>   <math>2.9 \pm 0.1^c</math><br/> (2) <math>2.1 \pm 0.1^b</math>   <math>4.2 \pm 0.2^a</math>   <math>&gt;100^d</math>   <math>&gt;100^c</math><br/> (3) <math>&gt;100^b</math>   <math>&gt;100^a</math>   <math>&gt;100^d</math>   <math>&gt;100^c</math><br/> (4) <math>81.7 \pm 0.3^b</math>   <math>64.3 \pm 0.3^a</math>   <math>&gt;100^d</math>   <math>5.9 \pm 0.1^c</math><br/> (5) <math>20.5 \pm 0.4^b</math>   <math>22.6 \pm 0.3^a</math>   <math>62.3 \pm 0.5^d</math>   <math>4.6 \pm 0.1^c</math><br/> (6) <math>&gt;100^b</math>   <math>70.1 \pm 0.4^a</math>   <math>89 \pm 0.5^d</math>   <math>2.6 \pm 0.1^c</math></p> | 3 |
|  <p>[Cu(tpy)(dppz)]<sup>2+</sup> (1)      [Cu(tptz)<sub>2</sub>]<sup>2+</sup> (2)</p> | <p>(1) <math>4.57 \mu\text{M}^d</math><br/> (2) <math>1.98 \mu\text{M}^d</math></p>                                                                                                                                                                                                                                                                                                                                                                                                                                                                                                                                                                                                                                                       | 4 |

<sup>a</sup> A549 cell; <sup>b</sup> HCT116 cell; <sup>c</sup> A2780 cell; <sup>d</sup> MCF-7 cell

1. B. Đ. Glišić, J. Nikodinovic-Runic, T. Ilic-Tomic, H. Wadepohl, A. Veselinović, I. M. Opsenica and M. I. Djuran, *Polyhedron*, 2018, **139**, 313-322.
2. A. Maroń, K. Czerwińska, B. Machura, L. Raposo, C. Roma-Rodrigues, A. R. Fernandes, J. G. Małecki, A. Szlapa-Kula, S. Kula and S. Krompiec, *Dalton Trans.*, 2018, **47**, 6444-6463.
3. K. Czerwińska, B. Machura, S. Kula, S. Krompiec, K. Erfurt, C. Roma-Rodrigues, A. R. Fernandes, L. S. Shul'pina, N. S. Ikonnikov and G. B. Shul'pin, *Dalton Trans.*, 2017, **46**, 9591-9604.
4. M. Salimi, K. Abdi, H. M. Kandelous, H. Hadadzadeh, K. Azadmanesh, A. Amanzadeh and H. Sanati, *BioMetals*, 2015, **28**, 267-278.
